# Supplementary material for: Gene Flow in Genetically Modified Wheat
Source: PubMed Central journal article supplement (PMC3246478; doi:10.1371/journal.pone.0029730), 2011-12-27

**Figure S1. Schematic design of a cross-pollination plot.** In the centre a 1 m<sup>2</sup> quadratic subplot of GM wheat was sown as a pollen source. In the eastern and western direction corresponding non-GM plants were sown as pollen recipients into distance subplots (0.5 x 1 m). The lightly shaded distance subplots were harvested after seed maturation.

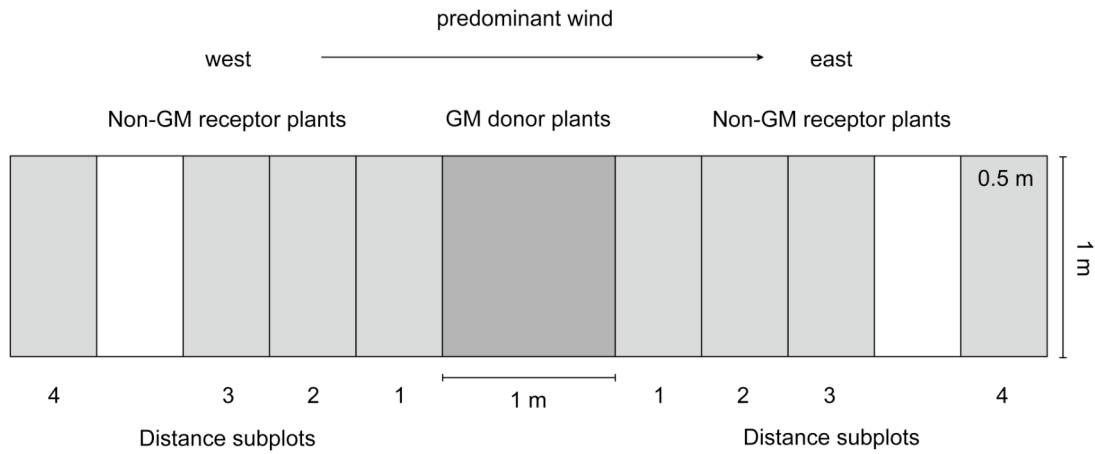

Supplement: pone.0029730.s001.pdf [file pone.0029730.s001.pdf]
