# Supplementary material for: Gene Flow in Genetically Modified Wheat
Source: PubMed Central journal article supplement (PMC3246478; doi:10.1371/journal.pone.0029730), 2011-12-27

**Figure S2. PCR analysis from flour of different seed mixtures containing 10%, 2%, 0.5% and 0.2% GM seeds.** The positive bands show decreasing signal strength as the proportion of GM seed material decreases. Each analysis was replicated three times.

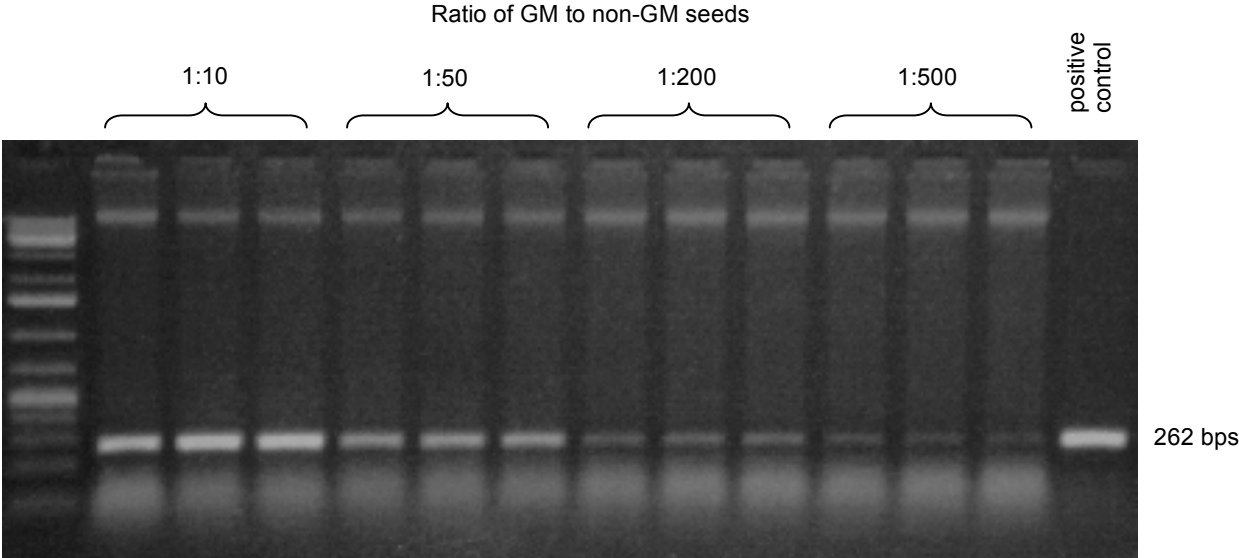

Supplement: pone.0029730.s002.pdf [file pone.0029730.s002.pdf]
