# Supplementary material for: Gene Flow in Genetically Modified Wheat
Source: PubMed Central journal article supplement (PMC3246478; doi:10.1371/journal.pone.0029730), 2011-12-27

**Figure S3. PCR analysis of wheat flower shows presence or absence of transgenes.**

Distinct white bands at the same height as the positive control indicate successful amplification of transgenic promoter regions (columns nr. 1, 3, 6, 8, 9, 10).

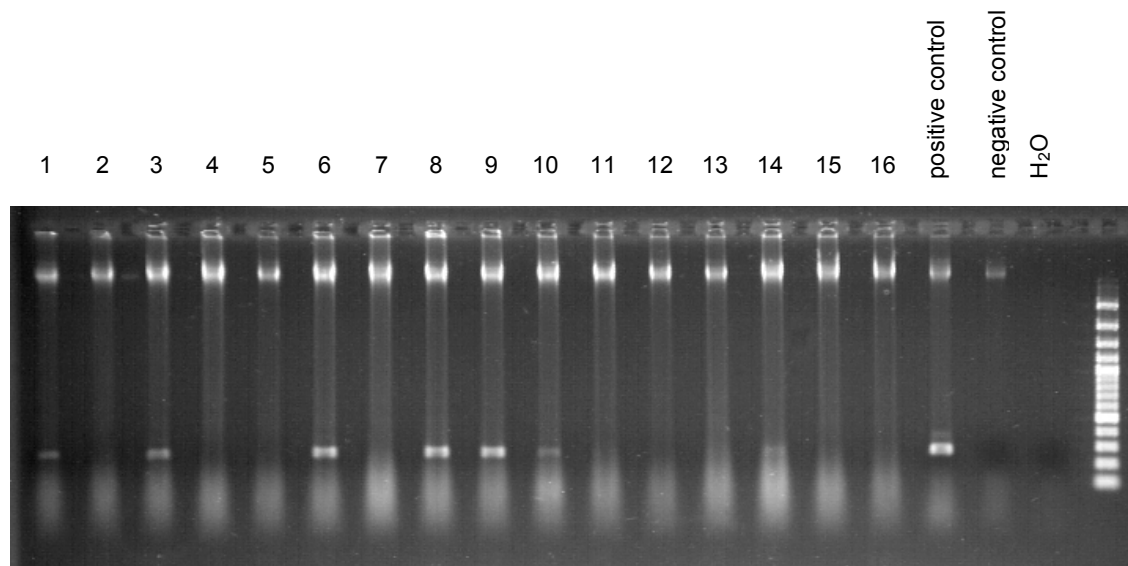

Supplement: pone.0029730.s003.pdf [file pone.0029730.s003.pdf]
