# Supplementary material for: Gene Flow in Genetically Modified Wheat
Source: PubMed Central journal article supplement (PMC3246478; doi:10.1371/journal.pone.0029730), 2011-12-27
Supplement: pone.0029730.s005.pdf [file pone.0029730.s005.pdf]

**Table S2. Factors influencing cross-pollination rates in experiment 2.** This analysis of deviance table shows the effect of the wind direction (west vs. east), distance to pollen source (divided into log(distance) and residuals), plant variety and line identity as well as their interactions on the rate of cross-pollination.

Abbreviations: df = degree of freedom, % DV = % deviance change due to addition of terms to model, F pr. = error probability based on approximate F-ratios (ratios of mean deviance changes).

| Source of variation                                 | df | % DV  | F pr.   |
|-----------------------------------------------------|----|-------|---------|
| Block                                               | 3  | 1.1   | 0.429   |
| West vs. east                                       | 1  | 1.5   | 0.048   |
| log(distance)                                       | 1  | 41.4  | < 0.001 |
| Residual distance                                   | 1  | 0.0   | 0.913   |
| Bobwhite vs. Frisal                                 | 1  | 3.7   | 0.002   |
| <i>Pm3b#1</i> vs. <i>Pm3b#2</i>                     | 1  | 0.6   | 0.224   |
| West vs. east x log(distance)                       | 1  | 0.5   | 0.281   |
| West vs. east x residual distance                   | 1  | 0.0   | 0.768   |
| log(distance) x Bobwhite vs. Frisal                 | 1  | 0.2   | 0.531   |
| Residual distance x Bobwhite vs. Frisal             | 1  | 0.1   | 0.640   |
| log(distance) x <i>Pm3b#1</i> vs. <i>Pm3b#2</i>     | 1  | 0.9   | 0.127   |
| Residual distance x <i>Pm3b#1</i> vs. <i>Pm3b#2</i> | 1  | 0.1   | 0.656   |
| Residual                                            | 81 | 50.0  |         |
| Total                                               | 95 | 100.0 |         |
