# Supplementary material for: Gene Flow in Genetically Modified Wheat
Source: PLoS One. 2011 Dec 27;6(12):e29730. doi: 10.1371/journal.pone.0029730 (PMC3246478; doi:10.1371/journal.pone.0029730)
Supplement: Table S1 — Factors influencing the rate of cross-pollination of GM and non-GM wheat in experiment 1. (PDF) [file pone.0029730.s004.pdf]

**Table S1. Factors influencing the rate of cross-pollination of GM and non-GM wheat in experiment 1.** This analysis of deviance table shows the effects of block and fertilizer (conditions under which parental plants grew in the 2008 field experiment), pollen recipient line identity (one contrast between Bobwhite GM and non-GM lines: “*Pm3b* vs. control”; two contrasts within GM lines: “*Pm3b*#2 vs. residual *Pm3b* lines” and “within residual *Pm3b* lines”; residual differences between control lines: “Control”), pollen donor line identity (one contrast between Frisal and Casana: “Frisal vs. Casana”; one contrasts between Frisal GM and non-GM lines: “Frisal GM vs. Frisal control”; one contrast between GM lines: “Frisal A9 vs. Frisal A13”) as well as their interaction on the rate of cross-pollination. Abbreviations: df = degree of freedom, % DV = % deviance change due to addition of terms to model, F pr. = error probability based on approximate F-ratios (ratios of mean deviance changes).

| Source of variation                                                    | df  | % DV | F pr.   |
|------------------------------------------------------------------------|-----|------|---------|
| Block                                                                  | 3   | 3.1  | 0.052   |
| Fertiliser application                                                 | 1   | 0.2  | 0.461   |
| <i>Pm3b</i> vs. control                                                | 1   | 16.1 | < 0.001 |
| <i>Pm3b</i> #2 vs. residual <i>Pm3b</i> lines                          | 1   | 2.3  | 0.018   |
| Within residual <i>Pm3b</i> lines                                      | 2   | 0.5  | 0.566   |
| Control                                                                | 3   | 1.2  | 0.400   |
| Frisal vs. Casana                                                      | 1   | 0.1  | 0.566   |
| Frisal GM vs. Frisal control                                           | 1   | 0.0  | 0.924   |
| Frisal A9 vs. Frisal A13                                               | 1   | 9.6  | < 0.001 |
| <i>Pm3b</i> vs. control x Frisal vs. Casana                            | 1   | 0.0  | 0.935   |
| <i>Pm3b</i> vs. control x Frisal GM vs. Frisal control                 | 1   | 1.9  | 0.030   |
| <i>Pm3b</i> vs. control x Frisal A9 vs. Frisal A13                     | 1   | 0.2  | 0.444   |
| <i>Pm3b</i> #2 vs. residual <i>Pm3b</i> x Frisal vs. Casana            | 1   | 0.3  | 0.352   |
| <i>Pm3b</i> #2 vs. residual <i>Pm3b</i> x Frisal GM vs. Frisal control | 1   | 0.7  | 0.183   |
| <i>Pm3b</i> #2 vs. residual <i>Pm3b</i> x Frisal A9 vs. Frisal A13     | 1   | 0.0  | 0.992   |
| Control x Frisal vs. Casana                                            | 3   | 3.5  | 0.035   |
| Control x Frisal GM vs. Frisal control                                 | 3   | 1.3  | 0.365   |
| Control x Frisal A9 vs. Frisal A13                                     | 3   | 0.0  | 1.000   |
| Within residual x Frisal vs. Casana                                    | 2   | 1.1  | 0.260   |
| Within residual <i>Pm3b</i> x Frisal GM vs. Frisal control             | 2   | 7.0  | < 0.001 |
| Within residual <i>Pm3b</i> x Frisal A9 vs. Frisal A13                 | 2   | 7.6  | < 0.001 |
| Residual                                                               | 110 | 43.3 |         |
| Total                                                                  | 145 | 100  |         |
